# Supplementary material for: The Conserved Arginine Cluster in the Insert of the Third Cytoplasmic Loop of the Long Form of the D2 Dopamine Receptor (D2L-R) Acts as an Intracellular Retention Signal
Source: MDPI journal article supplement (doi:10.3390/ijms17071152), 2016-07-19
Supplement: s1 [file s1]

# Supplementary Materials: The Conserved Arginine Cluster in the Insert of the Third Cytoplasmic Loop of the Long form of the D<sub>2</sub> Dopamine Receptor (D<sub>2L</sub>-R) Acts as an Intracellular Retention Signal

Valentina Kubale, Kaja Blagotinšek, Jane Nøhr, Karin A. Eidne and Milka Vrecl

**Table S1.** The degree of colocalization between the D<sub>2L</sub>-R constructs and calnexin in transiently transfected HEK-293 cells.

| Construct          | Rcoloc        |
|--------------------|---------------|
| D <sub>2L</sub> -R | 0.76 ± 0.03   |
| M1                 | 0.40 ± 0.07 * |
| M2                 | 0.48 ± 0.10 * |
| M3                 | 0.51 ± 0.03 * |
| M4                 | 0.43 ± 0.01 * |
| M5                 | 0.41 ± 0.04 * |
| M6                 | 0.42 ± 0.06 * |
| M7                 | 0.44 ± 0.07 * |

\*,  $p < 0.05$ .

Pearson's correlation coefficient for image above thresholds (Rcoloc) was determined as described in Material and Methods. Rcoloc represents pixels where both channels (red and green) were above their respective threshold; its values range between -1.0 and 1.0, where -1, 0 and +1 indicates complete negative correlation, no significant correlation and perfect correlation, respectively. The data shown are the mean ± standard error of the mean (S.E.M.) of five to seven individual cells showing colocalization between the individual D<sub>2L</sub>-R construct and ER marker calnexin. The significance relative to the D<sub>2L</sub>-R was determined by one-way ANOVA with Dunnett's post hoc test (\*,  $p < 0.05$ ).
